# Supplementary material
Source: publisher figshare collection journal article supplement (https://tandf.figshare.com/articles/dataset/_/23730370)
Supplement: Supplementary file 1 [file 1]

# GEOLOGICAL AND GEOMORPHOLOGICAL MAP OF THE FOLAFÓTUR PENINSULA, WESTFJORDS, ICELAND

## Geodiversity and Cultural Sites

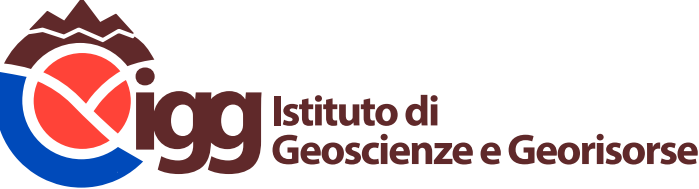

Alessandro Ellero<sup>1</sup>, Björn Oddsson<sup>2</sup>, Giuseppe Ottria<sup>1</sup>

1. CNR - Istituto di Geoscienze e Georisorse, Pisa  
2. Department of Earth Sciences-ETH Zurich, Sonneggstrasse 5, 8092 Zurich, Switzerland -  
The Association Fofafotur Geopark - Nature Reserve and Cultural Heritage,  
Laugavegur 47, 101 Reykjavik, Iceland

Topographic base redrawn from 10m resolution Digital Elevation Model (DEM) of Iceland-davailable from National Land Survey of Iceland (<https://www.lmi.is/en/>).  
Coordinate System: WGS84 Pseudo-Mercator EPSG:3857.  
All coordinates are in meters.  
Local toponyms previously unpublished are compiled from descriptions documented in the archives of The Árni Magnússon Institute for Icelandic Studies, University of Iceland.  
Original geological mapping made in July 2022.

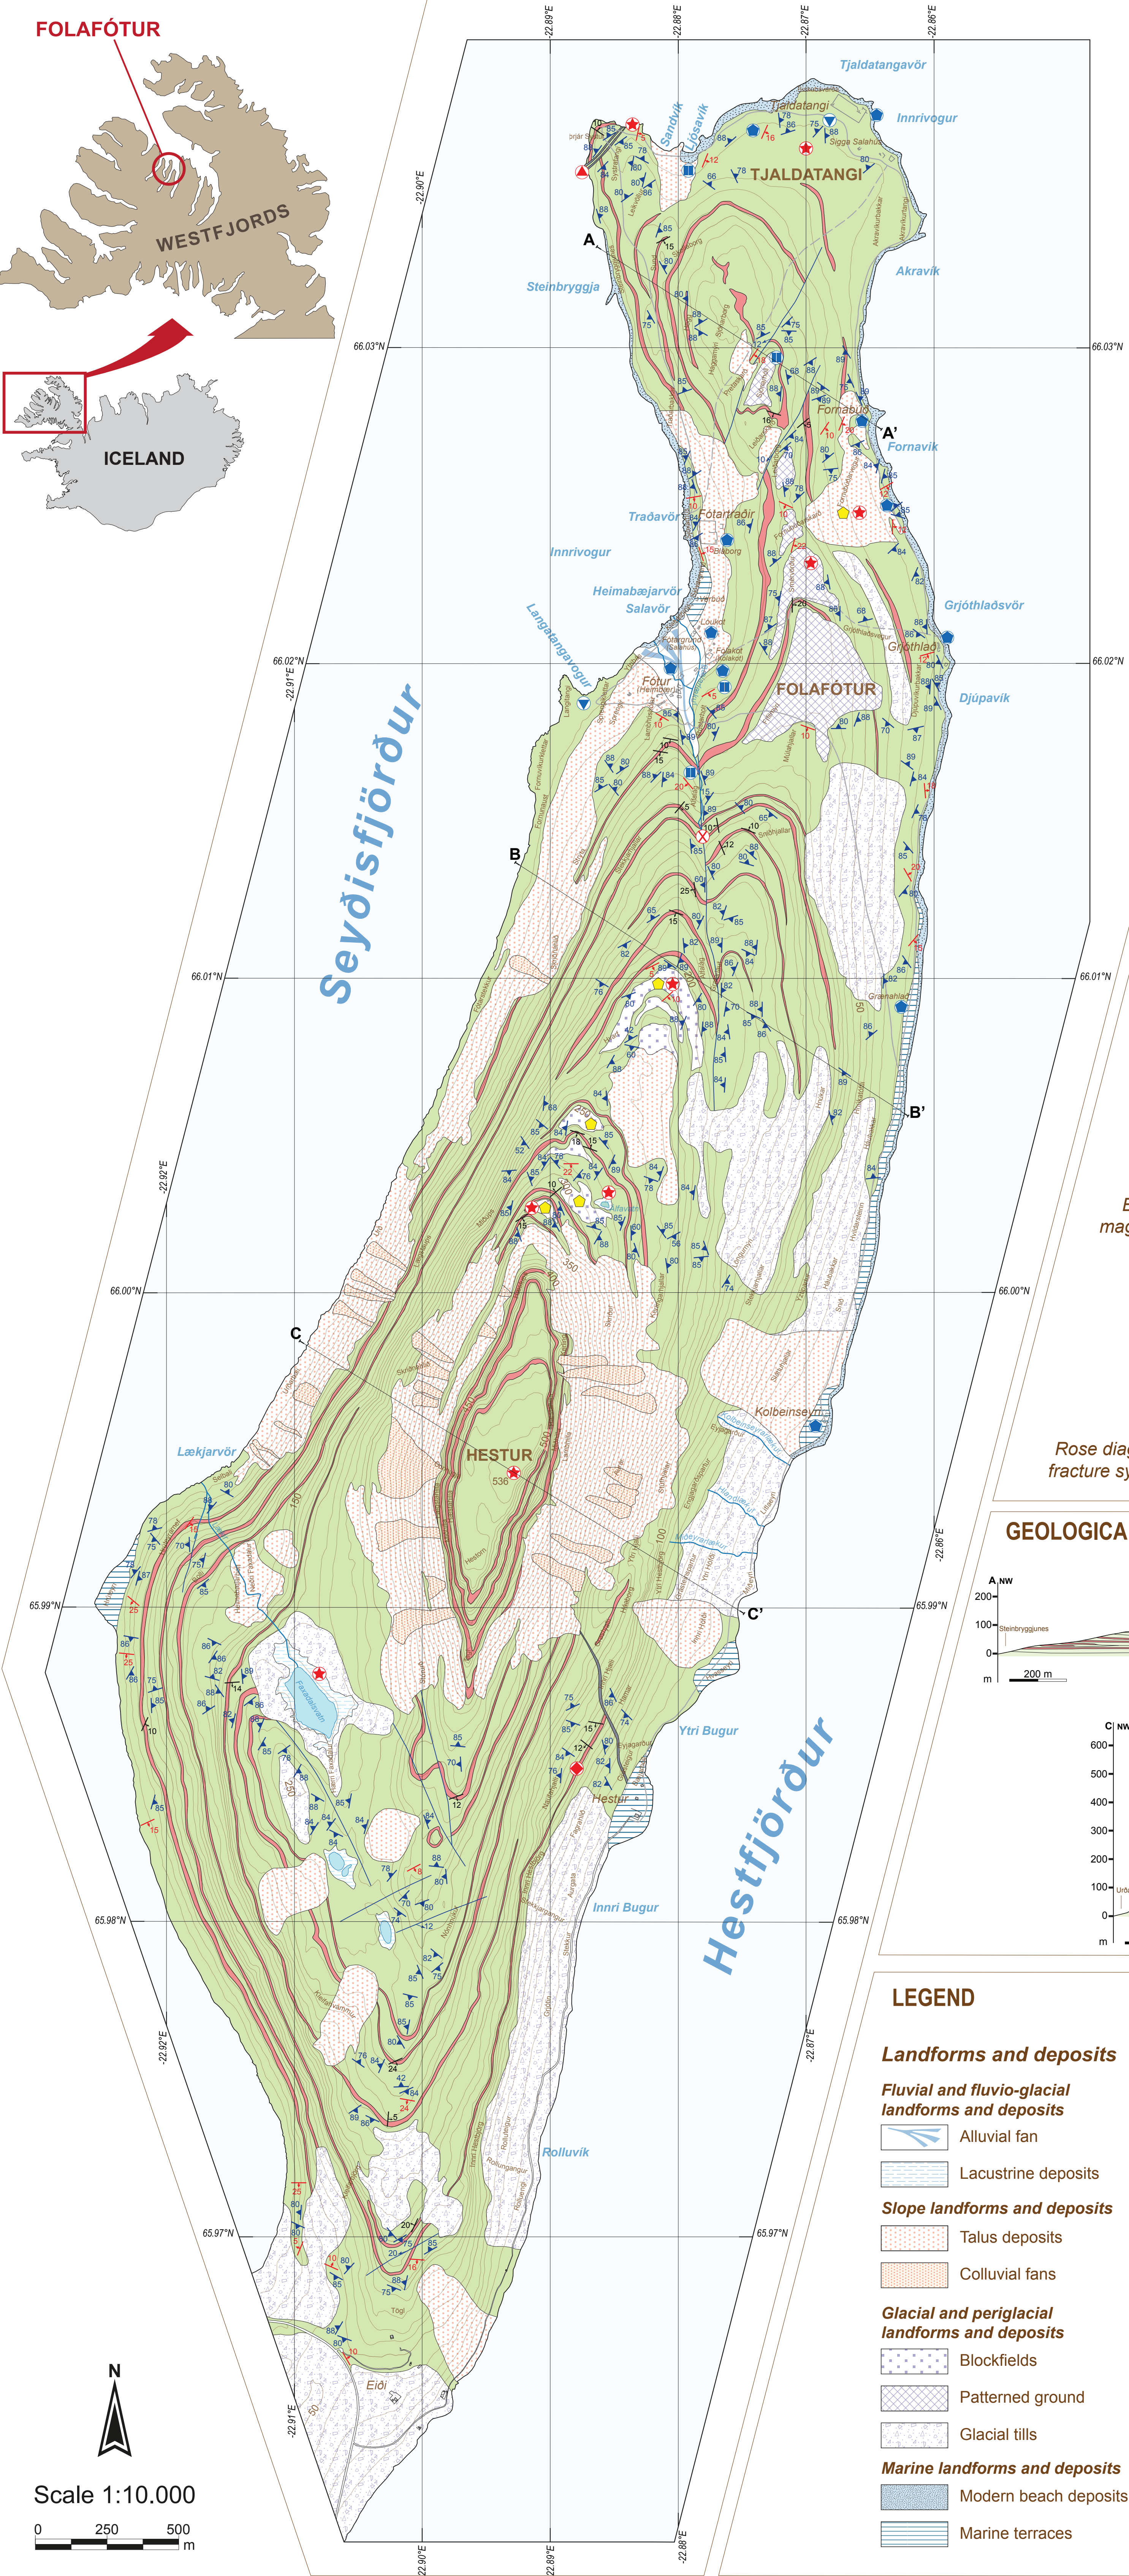

### GEODIVERSITY AND CULTURAL SITES

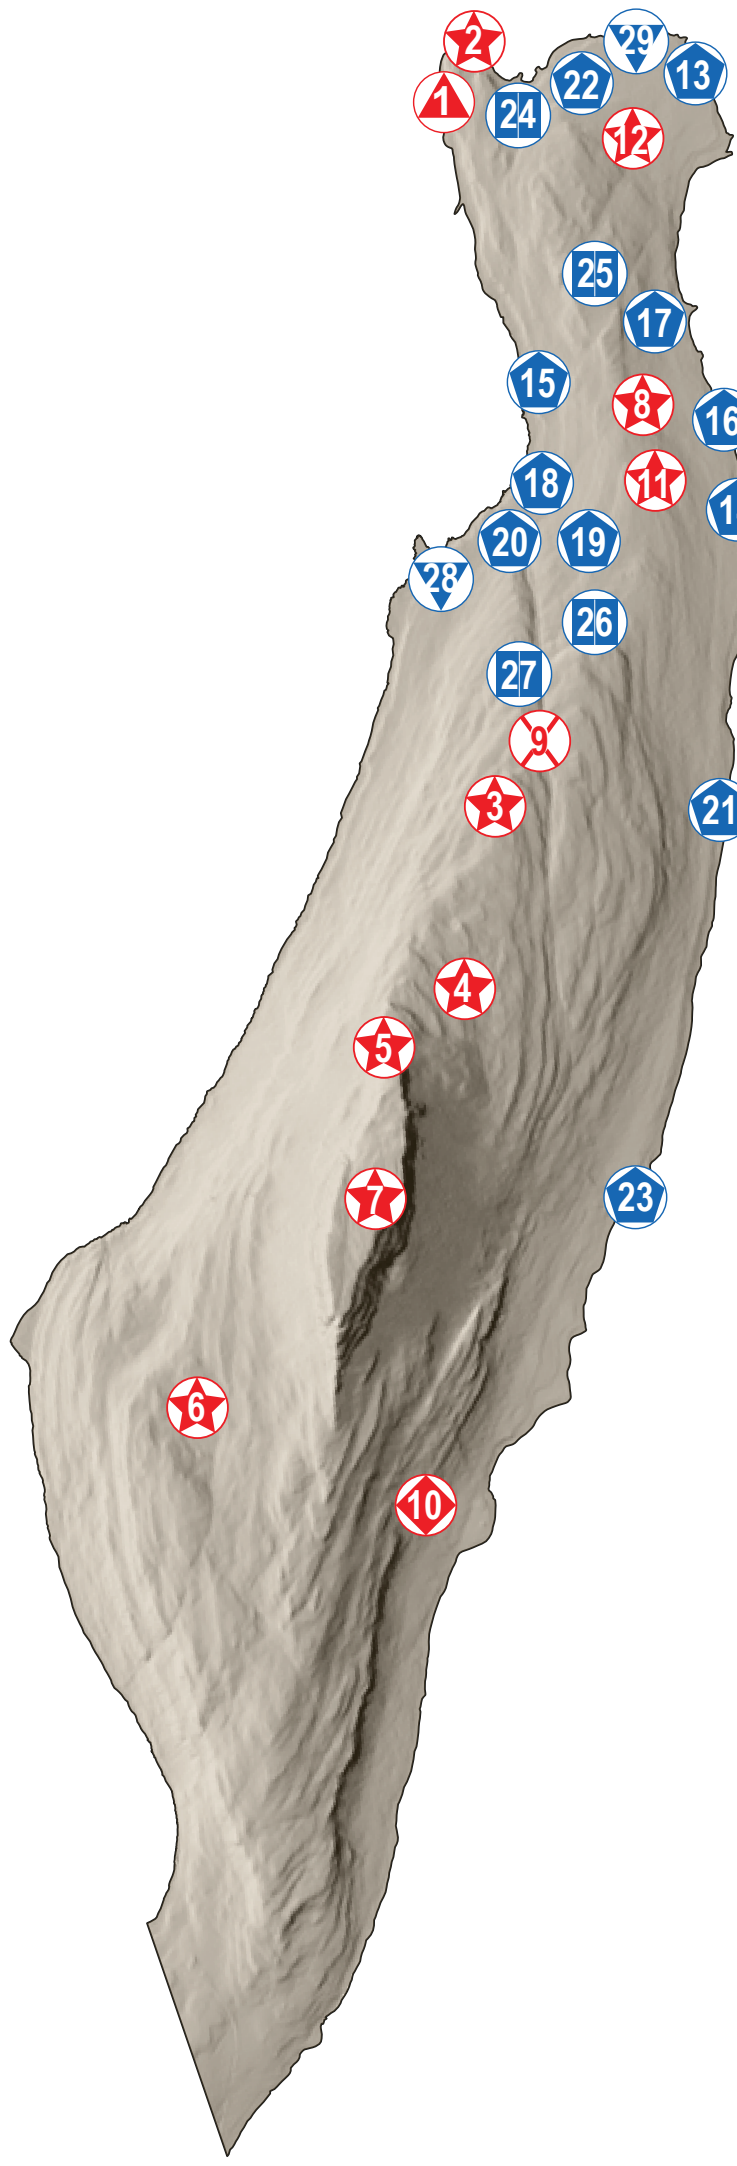

| ID | GEODIVERSITY SITE                                     | Primary Interest   |
|----|-------------------------------------------------------|--------------------|
| 1  | Systratangi Basalt Dykes                              | ▲ Magmatic         |
| 2  | Sandvík Tafari                                        | ★ Geomorphological |
| 3  | Álfasiðta Boulders                                    | ★ Geomorphological |
| 4  | Álfavtn Lake                                          | ★ Geomorphological |
| 5  | Hásæti Tröllsins Natural Sculpture                    | ★ Geomorphological |
| 6  | Faxadalsvatn Lake                                     | ★ Geomorphological |
| 7  | Hestur Ridge                                          | ★ Geomorphological |
| 8  | Fornubúðarvegur Boulder                               | ★ Geomorphological |
| 9  | Álfalág Fault                                         | ✕ Tectonic         |
| 10 | Nautahjalli Basalt Lava Flow and Sedimentary Deposits | ◆ Lithological     |
| 11 | Smérvörður Patterned Grounds                          | ★ Geomorphological |
| 12 | Tjaldatangi Wave cut Platform                         | ★ Geomorphological |

| ID | CULTURAL SITE                      | Primary Interest |
|----|------------------------------------|------------------|
| 13 | Tjaldatangi Ruins                  | ● Archaeological |
| 14 | Grjóthlað Ruins                    | ● Archaeological |
| 15 | Fótatræðir Ruins                   | ● Archaeological |
| 16 | Fornubúðarvegur Ruins              | ● Archaeological |
| 17 | Fornabúð Ruins                     | ● Archaeological |
| 18 | Lókot Ruins                        | ● Archaeological |
| 19 | Folakot Ruins                      | ● Archaeological |
| 20 | Fótur Ruins                        | ● Archaeological |
| 21 | Grænahlað Ruins                    | ● Archaeological |
| 22 | Ljósavík Ruins                     | ● Archaeological |
| 23 | Kolbeinseyri Ruins                 | ● Archaeological |
| 24 | Ljósavík Beach                     | ■ Literature     |
| 25 | Sjónarhóll Viewpoint               | ■ Literature     |
| 26 | Fótur Hills Viewpoint              | ■ Literature     |
| 27 | Álfalág cleft of the helves        | ■ Literature     |
| 28 | Langitangi Landing Place           | ▼ Historic       |
| 29 | Einar Guðfinnsson's starting point | ▼ Historic       |

### STATISTICAL ANALYSIS OF MESOSCOPIC STRUCTURES (equal-area stereographic projection, lower hemisphere)

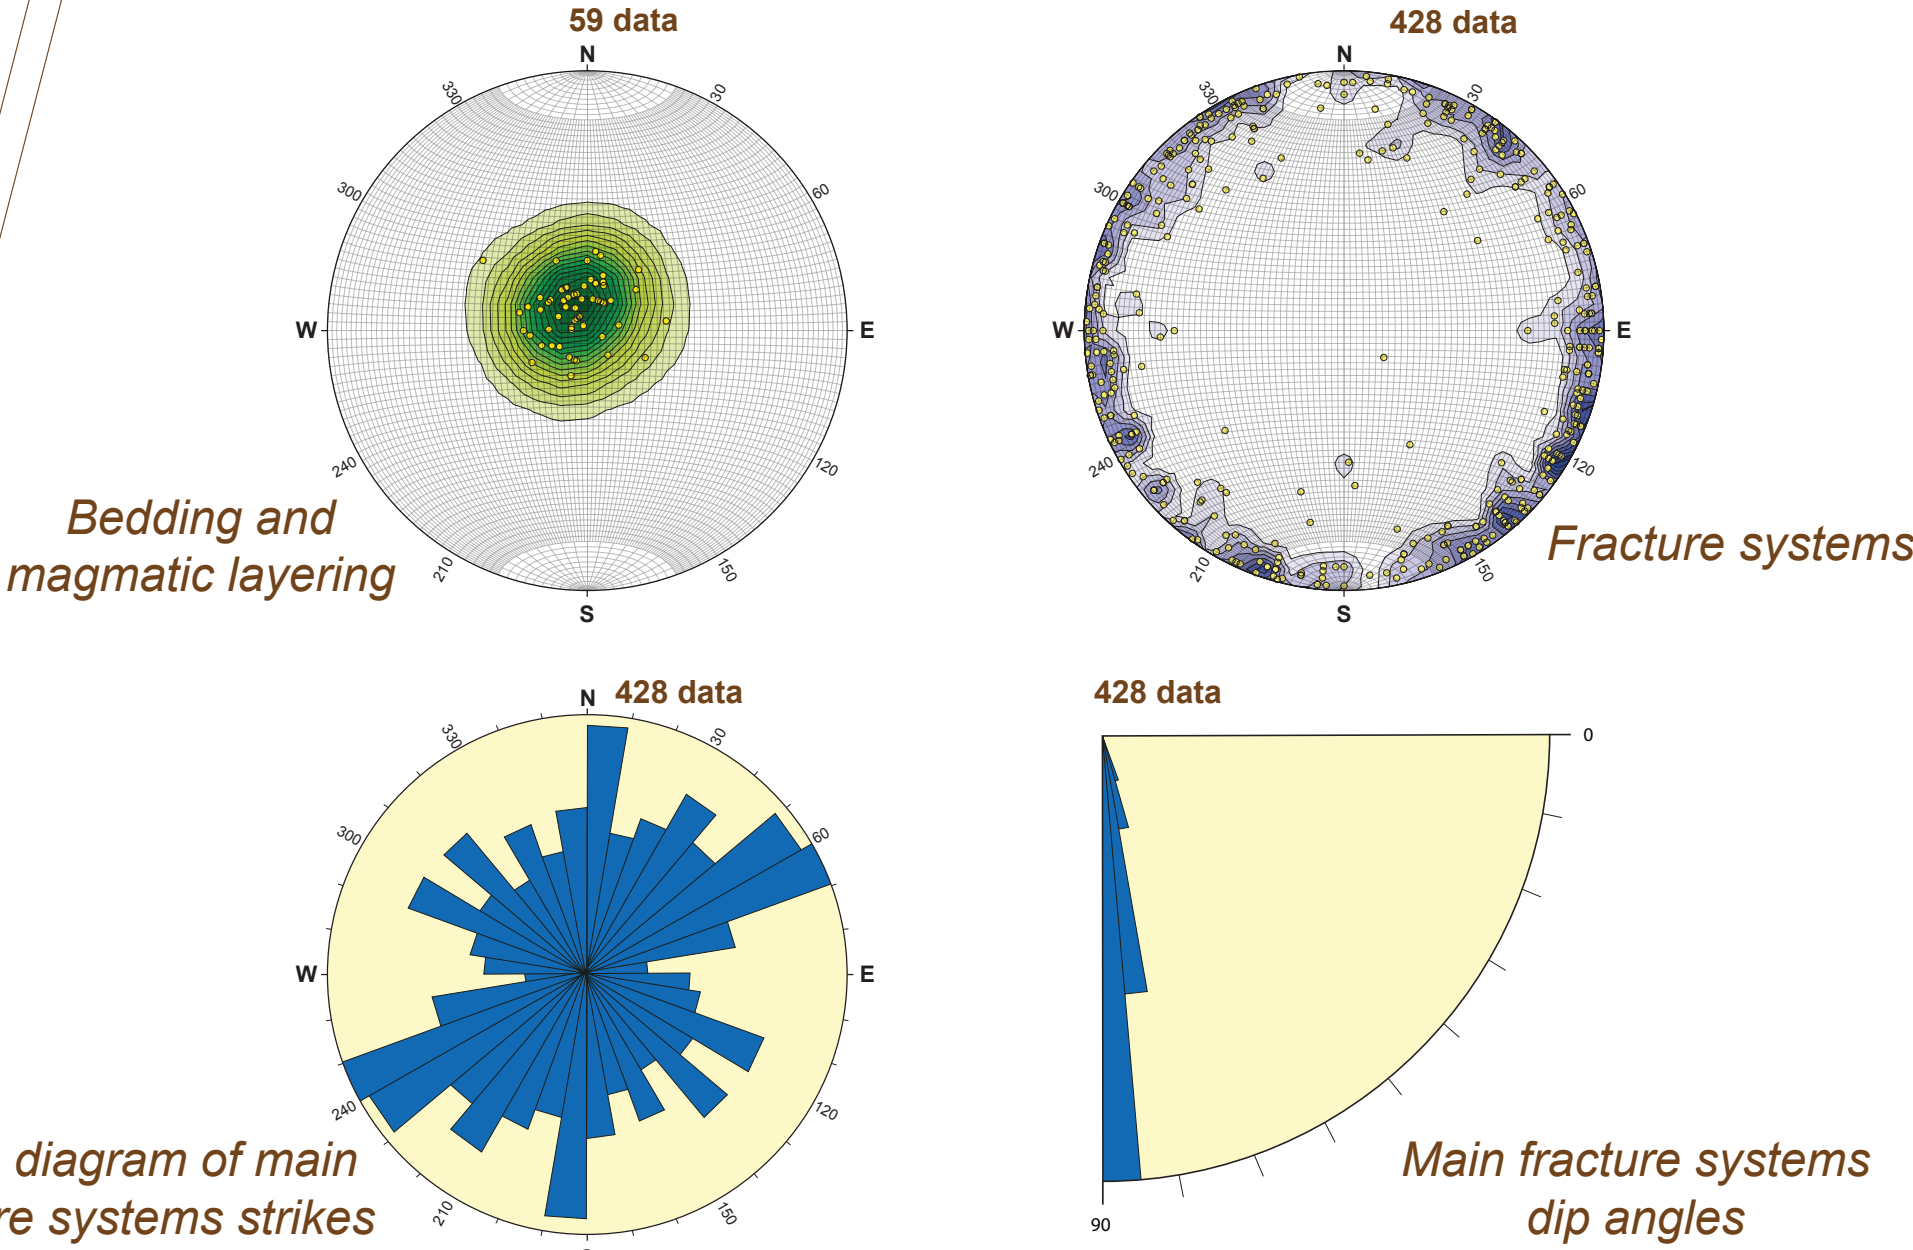

### GEOLOGICAL CROSS-SECTIONS

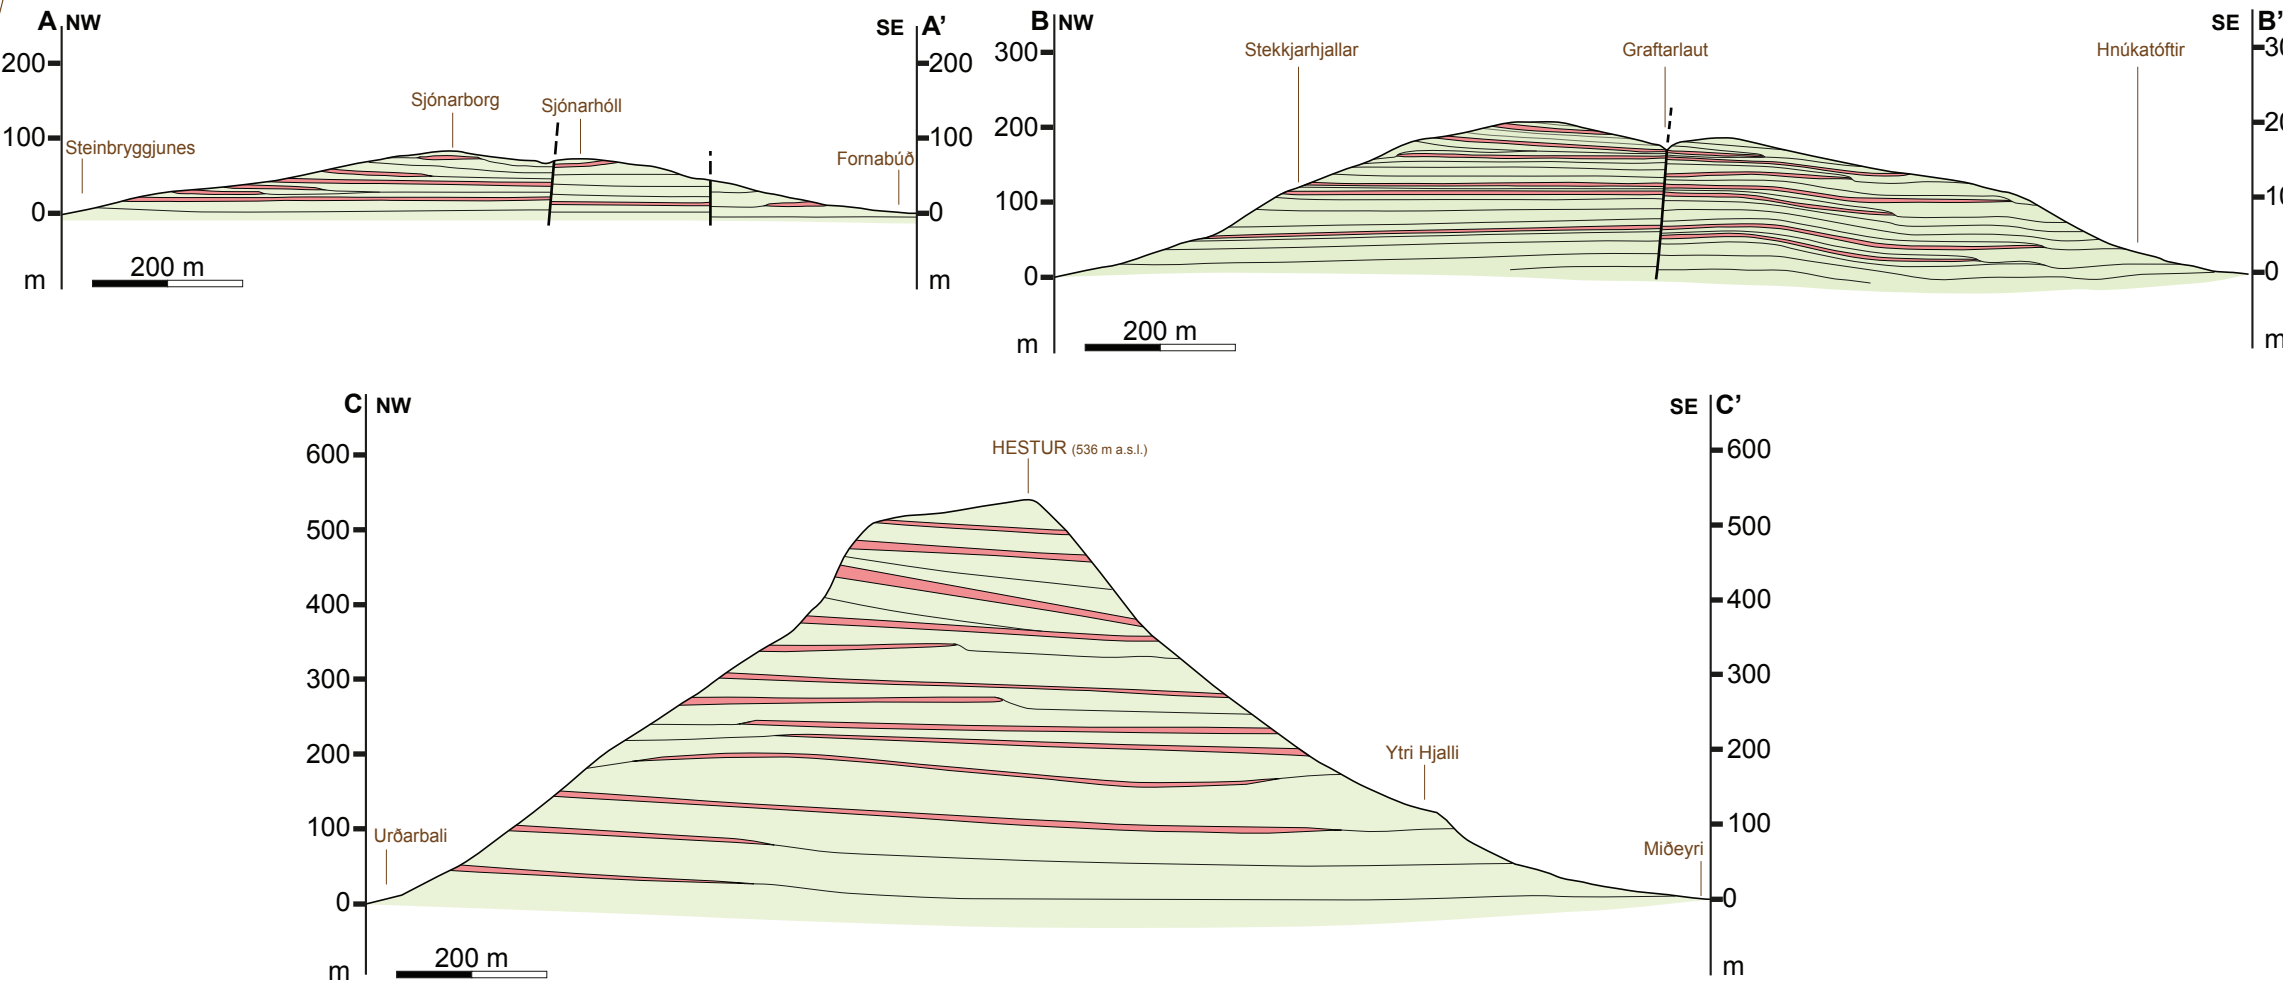

### LEGEND

#### Landforms and deposits

##### Fluvial and fluvio-glacial landforms and deposits

- Alluvial fan
- Lacustrine deposits

##### Slope landforms and deposits

- Talus deposits
- Colluvial fans

##### Glacial and periglacial landforms and deposits

- Blockfields
- Patterned ground
- Glacial tills

##### Marine landforms and deposits

- Modern beach deposits
- Marine terraces

#### Bedrock

- Basaltic dikes
- Sedimentary deposits (argillites, siltstones, sandstones and conglomerates)
- Tholeiitic and porphyritic basalts

#### Structural and Geomorphological Symbols

- Lithological boundary
- Fault
- Bedding
- Magmatic layering
- Fracture
- Striae on fault plane
- Boulder

#### Geological and cultural sites

##### Geodiversity sites

- ▲ Magmatic interest
- ✕ Tectonic interest
- ◆ Lithologic interest
- ★ Geomorphologic interest

##### Cultural sites

- Archaeological interest
- Literature interest
- ▼ Historic interest

A A' Cross-sections
